# Supplementary material for: Planning Strategy to Optimize the Dose-Averaged LET Distribution in Large Pelvic Sarcomas/Chordomas Treated with Carbon-Ion Radiotherapy
Source: MDPI journal article supplement (doi:10.3390/cancers15194903), 2023-10-09
Supplement: s1 [file s1]

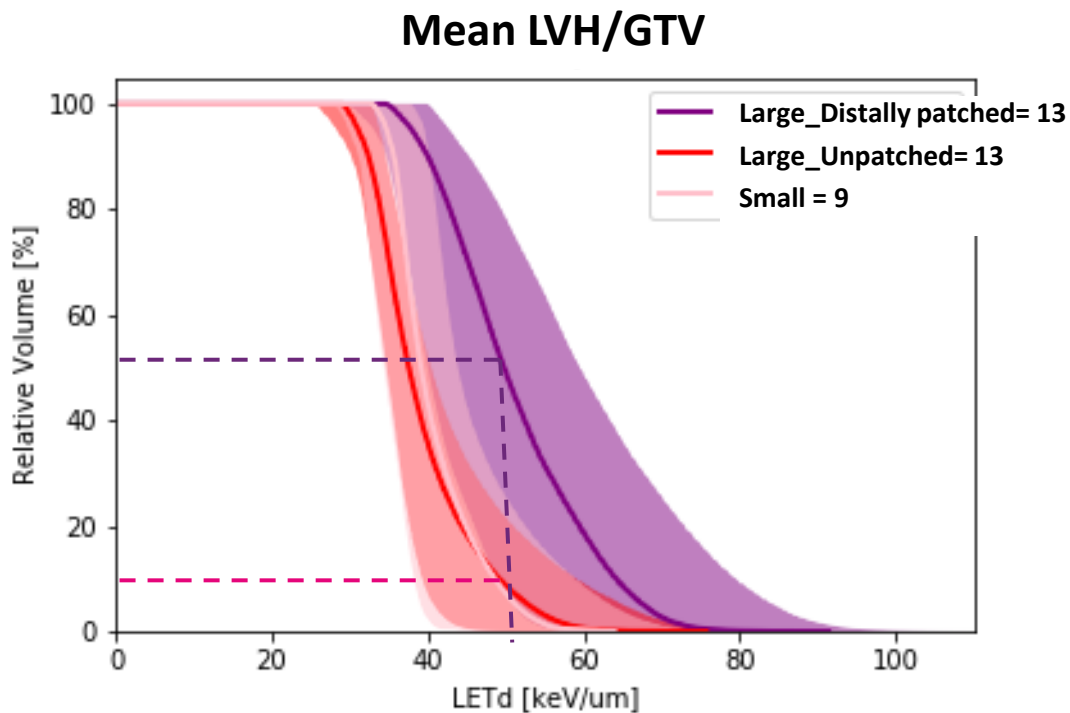

Figure S4. Cumulative relative-volume histogram (mean  $\pm$  SD) showing the fraction of GTV receiving  $>50$  keV/ $\mu$ m improved from  $<10\%$  in unpatched plans to  $\geq 50\%$  in distally-patched plans in large tumors. .
