# Supplementary material for: Planning Strategy to Optimize the Dose-Averaged LET Distribution in Large Pelvic Sarcomas/Chordomas Treated with Carbon-Ion Radiotherapy
Source: MDPI journal article supplement (doi:10.3390/cancers15194903), 2023-10-09
Supplement: s1 [file s1]

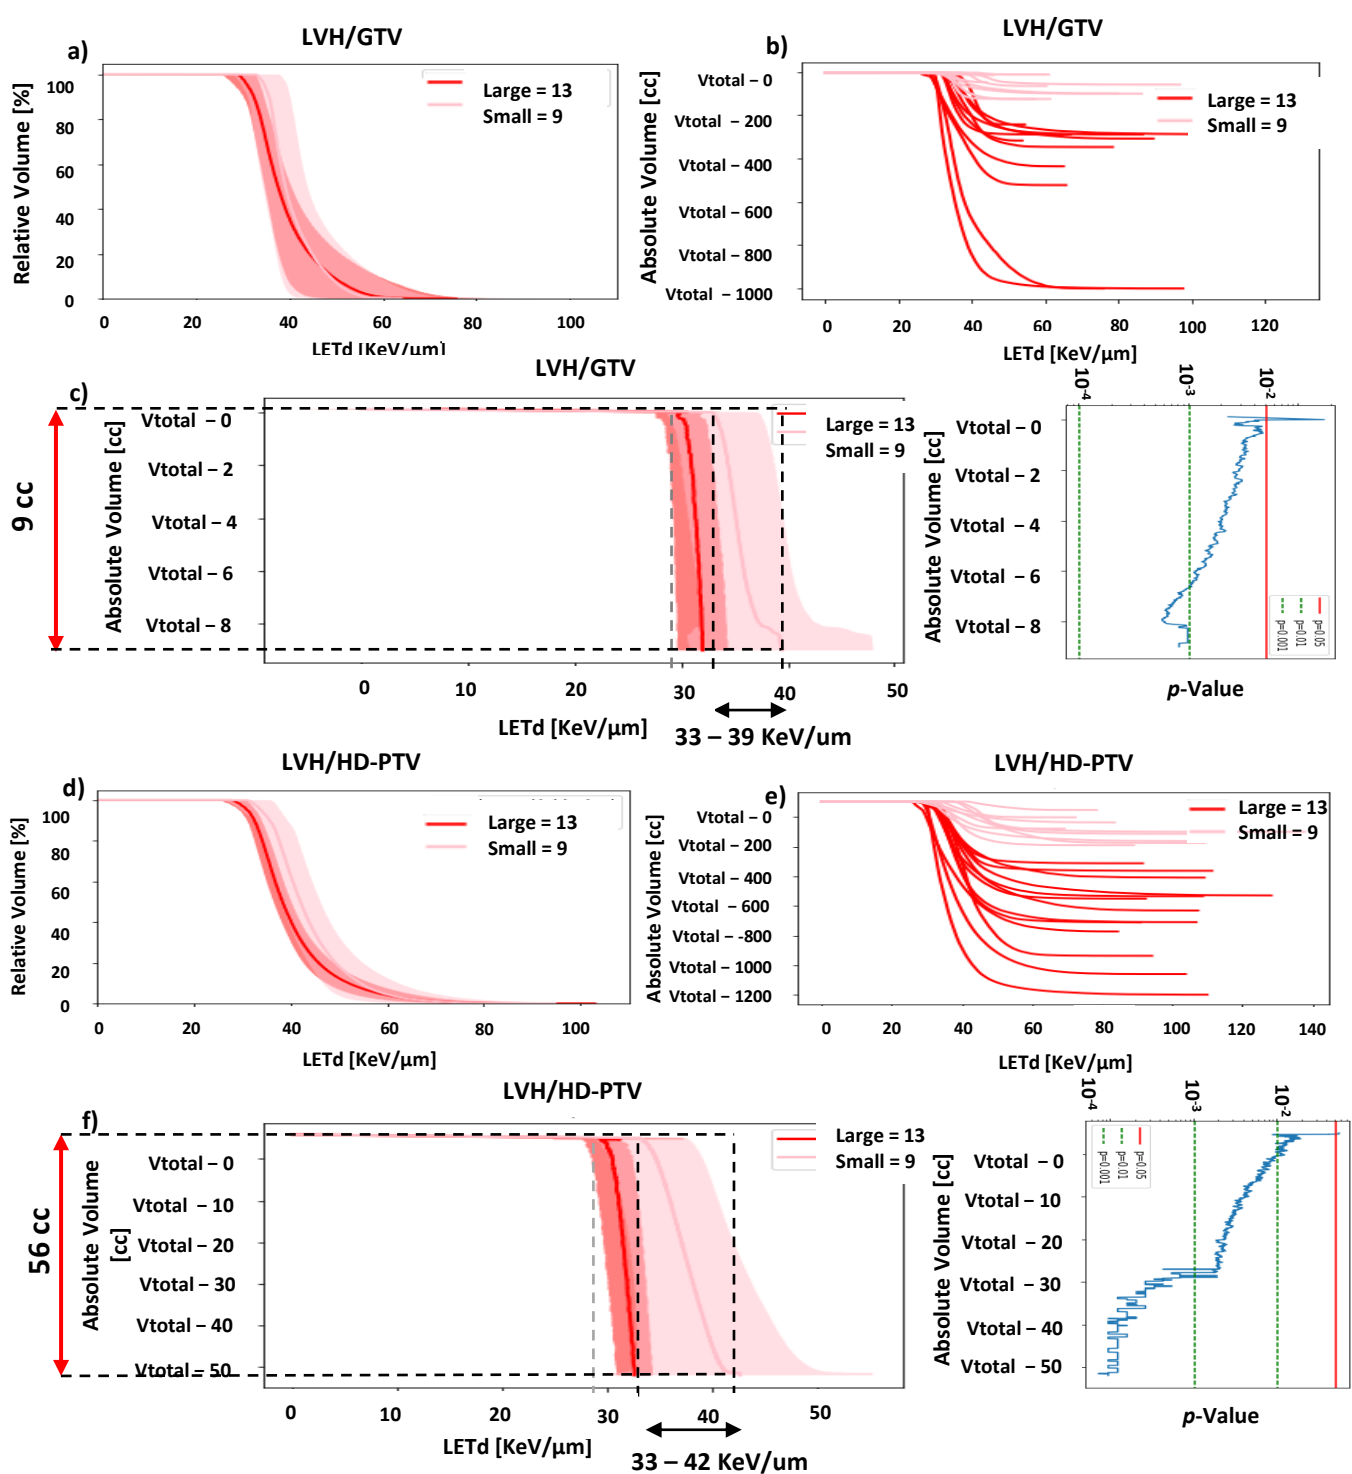

S1. LVH Evaluation for GTV and HD-PTV in small and large pelvic sarcomas/chordomas A relative-volume cumulative LVH for (a) GTV and (d) HD-PTV of small and large pelvic sarcoma (mean  $\pm$  SD), with LVH plot showing difference in LETd distribution. An absolute-volume LVH plots of individual cases shifted with respect to largest (b) GTV and (e) HD-PTV (Vtotal = volume of largest HD-PTV/GTV), demonstrating distinct separation between LVH plots of large and small tumors. An absolute-volume cumulative LVH for (c) GTV and (f) HD-PTV of small and large pelvic sarcoma (mean  $\pm$  SD), showing a statistically significant difference ( $p < 0.05$ ) between interval of max tumor volume of at least 56 cm<sup>3</sup>, for HD-PTV and 9 cm<sup>3</sup>, for GTV that should receive LETd of at least  $\geq 33$ -42 keV/μm.
