# Supplementary material for: Planning Strategy to Optimize the Dose-Averaged LET Distribution in Large Pelvic Sarcomas/Chordomas Treated with Carbon-Ion Radiotherapy
Source: MDPI journal article supplement (doi:10.3390/cancers15194903), 2023-10-09
Supplement: s1 [file s1]

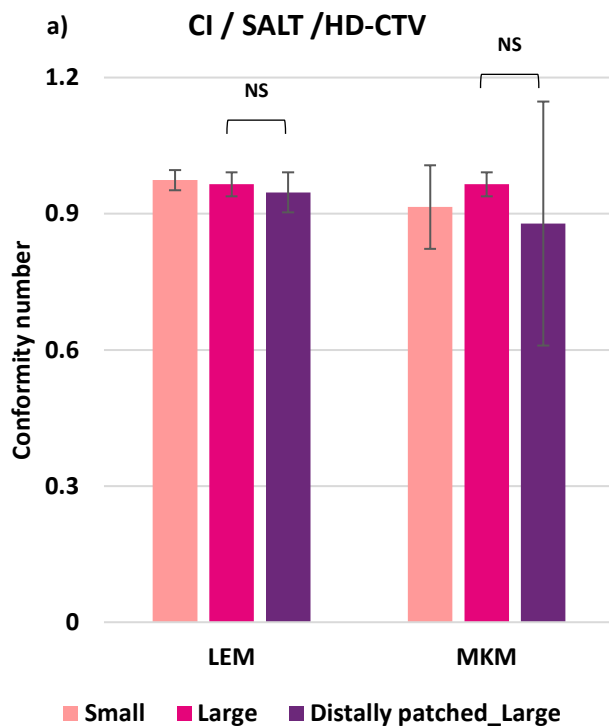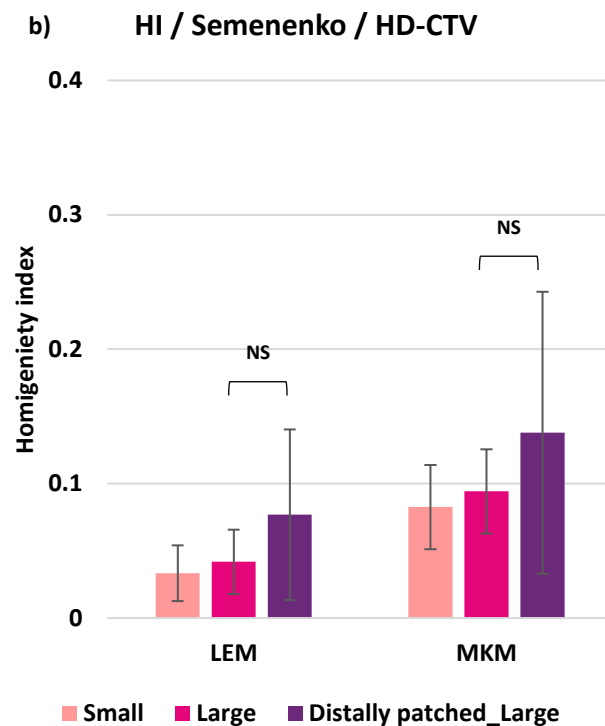

Figure S3. (a) Conformity index (left panel) and (b) homogeneity index (right panel) for small tumor, large tumors with unpatched plans and distally-patched plans. (n = 22, small = 9, Large unpatched = 13, Large- distally patched = 13).
