# Supplementary material for: Planning Strategy to Optimize the Dose-Averaged LET Distribution in Large Pelvic Sarcomas/Chordomas Treated with Carbon-Ion Radiotherapy
Source: MDPI journal article supplement (doi:10.3390/cancers15194903), 2023-10-09
Supplement: s1 [file s1]

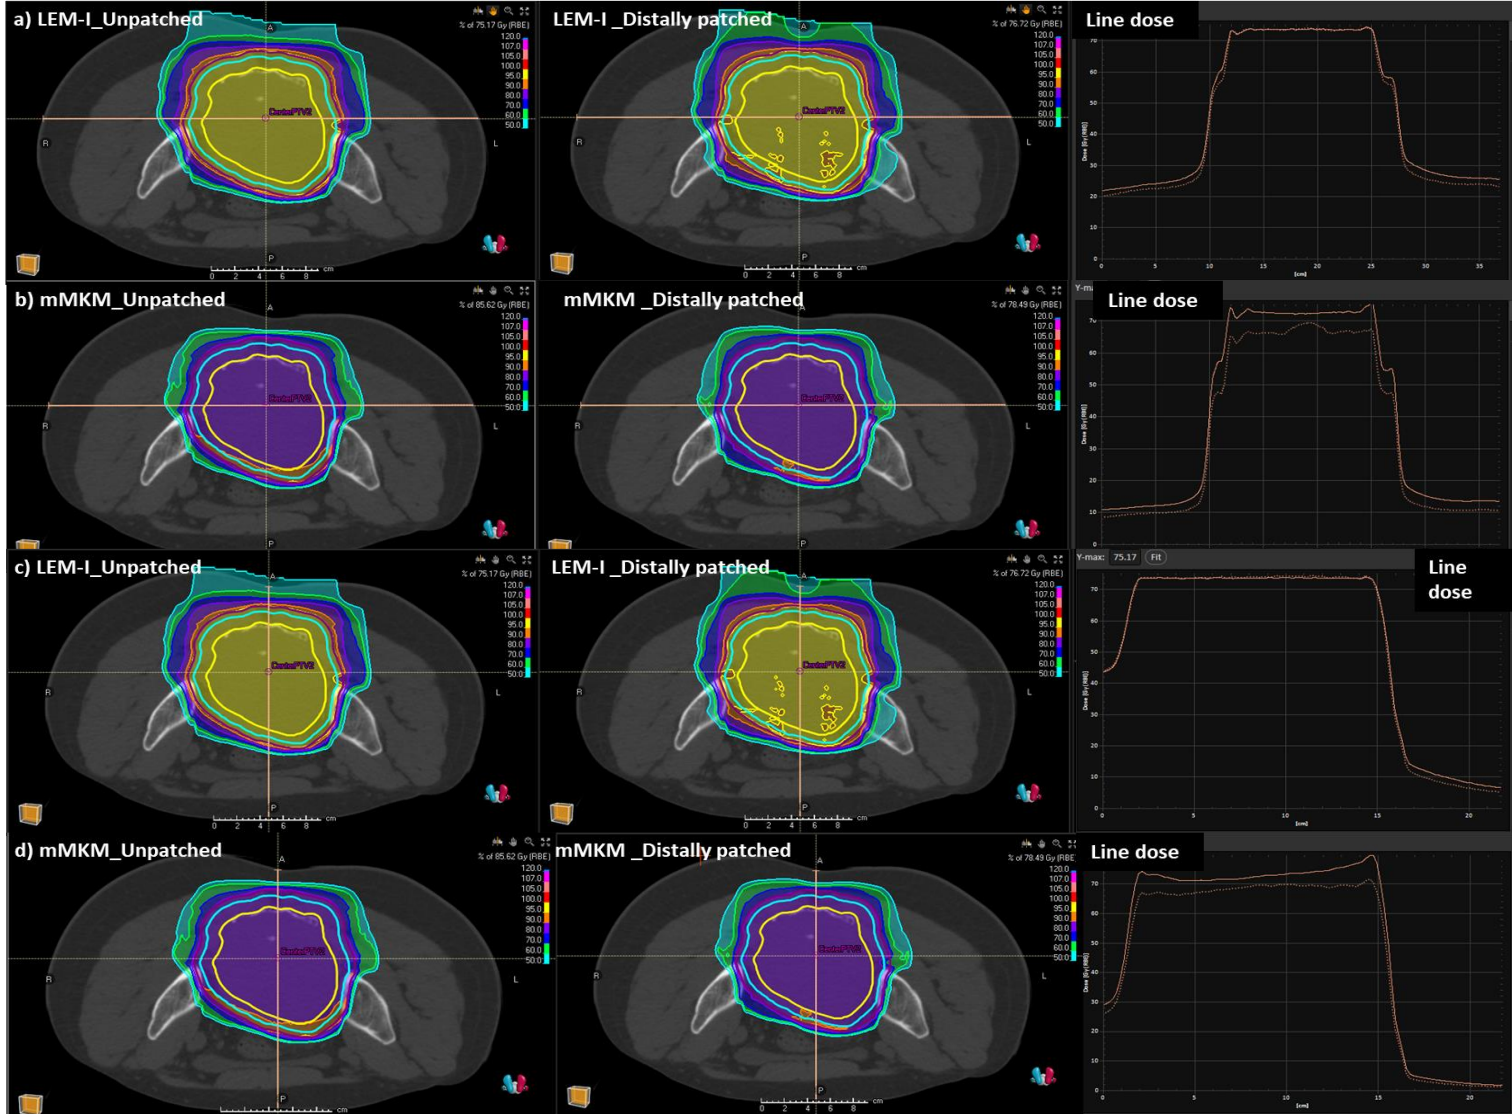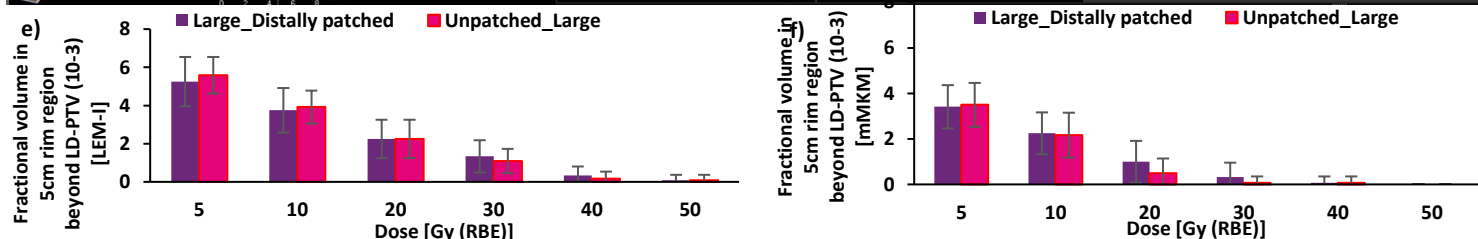

Figure S6. LETd optimization 'distal-patching': entrance region  $D_{RBE|LEM-I}$   $D_{RBE|mMKM}$  evaluation. No difference in  $D_{RBE|LEM-I}$   $D_{RBE|mMKM}$  in entrance dose region respectively is noted between distally-patched (dotted line) and unpatched (solid line) plan with respect to horizontal line doses. (a-b) with respect to vertical line doses (b-d). (e-f) Isodose levels 5, 10, 20, 30, 40 & 50 Gy (RBE) were converted into structures. There was no difference in volumes of isodose surfaces in the range of 5-50 Gy (RBE) between distally-patched and unpatched plans.
