# Supplementary material for: Planning Strategy to Optimize the Dose-Averaged LET Distribution in Large Pelvic Sarcomas/Chordomas Treated with Carbon-Ion Radiotherapy
Source: MDPI journal article supplement (doi:10.3390/cancers15194903), 2023-10-09
Supplement: s1 [file s1]

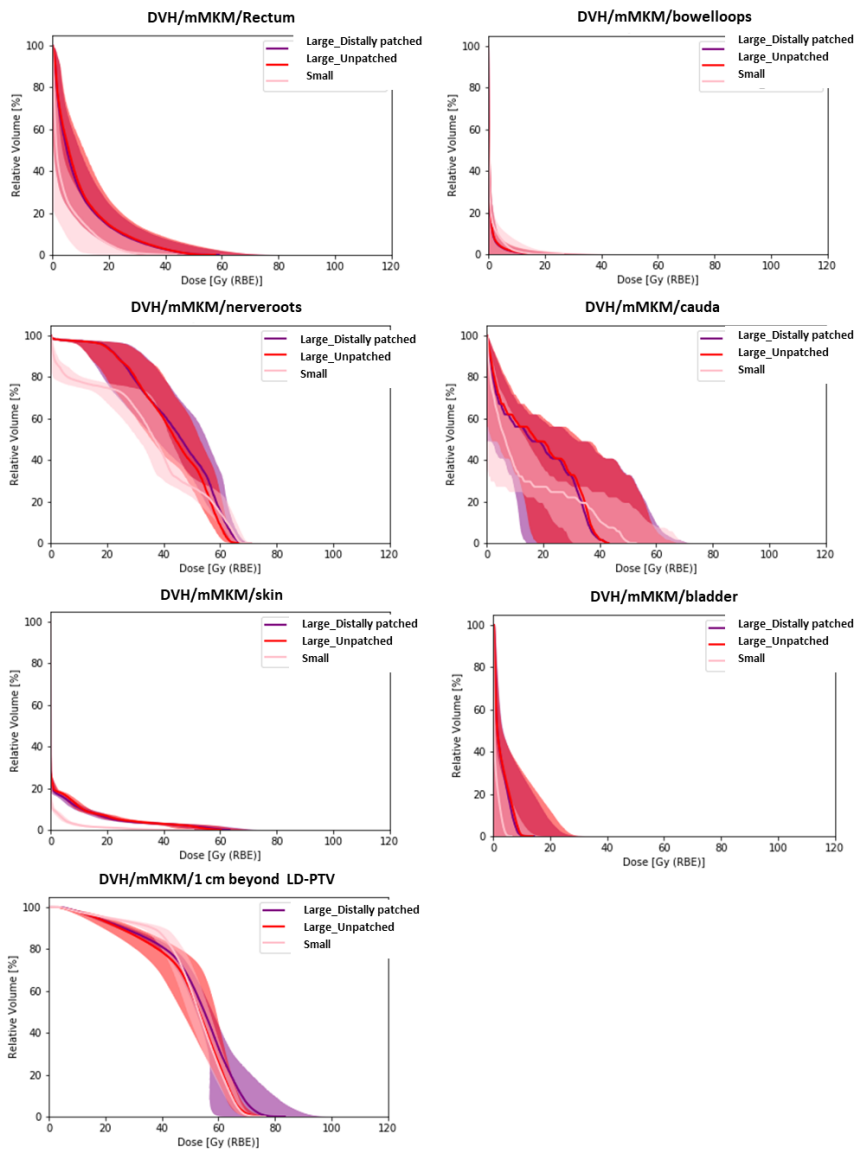

Figure S9. LETd optimization using ‘distal-patching’: Cumulative relative-volume DVH (mMKM) profiles (mean  $\pm$  SD) for OARs (a) Rectum, (b) Small intestine/bowelloops, (c) sacral nerveroots, (d) cauda equina, (e) skin, (f) urinary bladder and (g) 1 cm shell around LD-PTV showing no significant difference in mMKM distribution in distally-patched plans in large tumors compared to unpatched plans in large and small tumors.
