# Supplementary material for: Planning Strategy to Optimize the Dose-Averaged LET Distribution in Large Pelvic Sarcomas/Chordomas Treated with Carbon-Ion Radiotherapy
Source: MDPI journal article supplement (doi:10.3390/cancers15194903), 2023-10-09
Supplement: s1 [file s1]

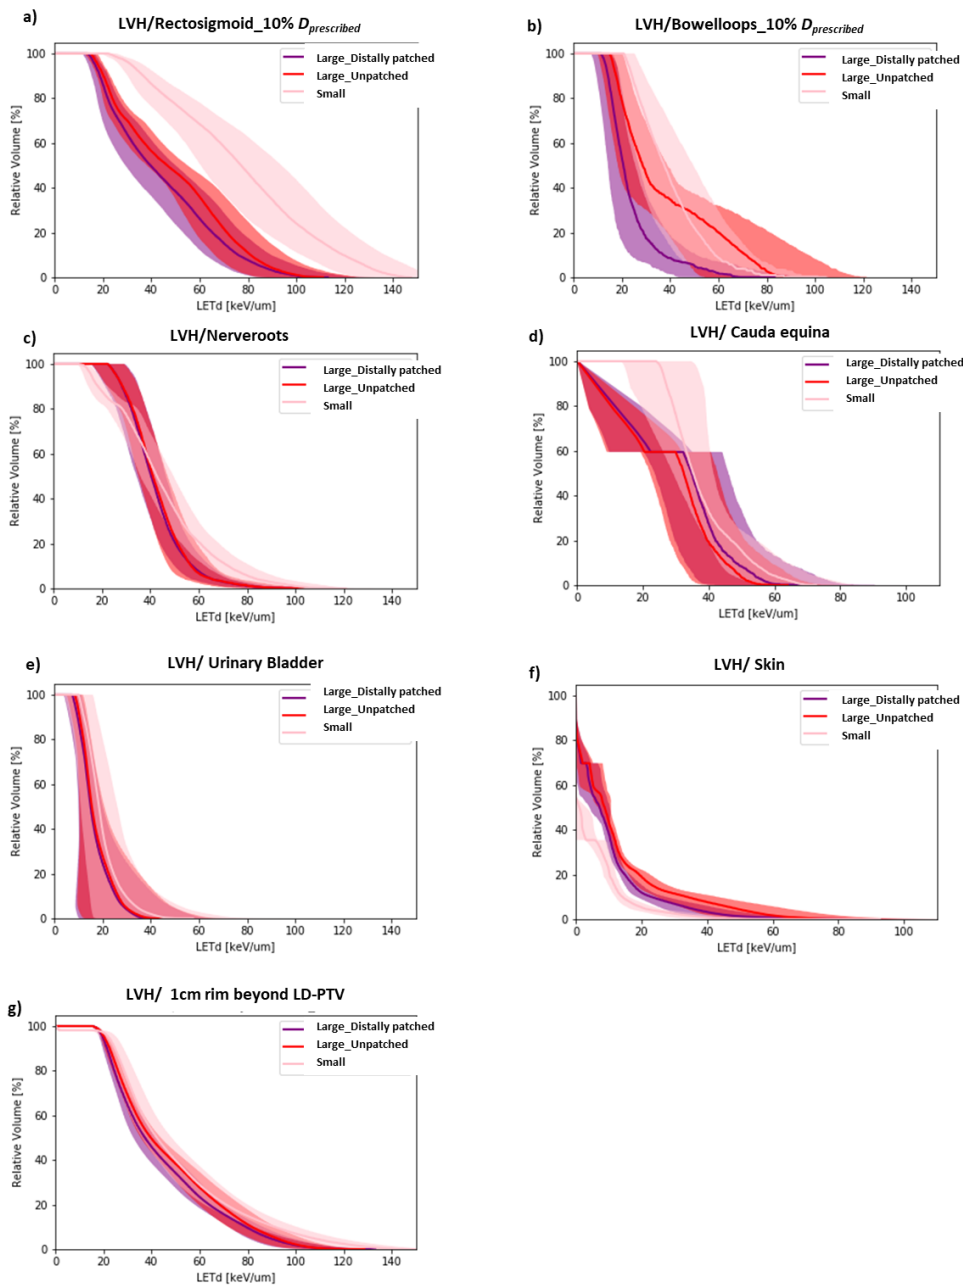

Figure S5. LETd optimization 'distal-patching': Cumulative relative-volume LVH profiles (mean  $\pm$  SD) for OARs (a) Rectosigmoid filtered for <10%  $D_{prescribed}$ , (b) Small intestine/bowelloops filtered for <10%  $D_{prescribed}$ , (c) sacral nerveroots, (d) cauda equina, (e) urinary bladder, (f) skin (g) 1 cm shell around LD-PTV showing acceptable LETd distribution beyond LD-PTV in distally-patched plans in large tumors compared to unpatched plans in large and small tumors. (Note less sample size in 2 organs due to filtering out low doses. Rectosigmoid filtered for <10%  $D_{prescribed}$ : small: 9, Large distally-patched: 11, Large unpatched:9, Small intestine/bowelloops filtered for <10%  $D_{prescribed}$ , small: 5, Large distally-patched: 6, Large unpatched:6).
