# Supplementary material for: Planning Strategy to Optimize the Dose-Averaged LET Distribution in Large Pelvic Sarcomas/Chordomas Treated with Carbon-Ion Radiotherapy
Source: MDPI journal article supplement (doi:10.3390/cancers15194903), 2023-10-09
Supplement: s1 [file s1]

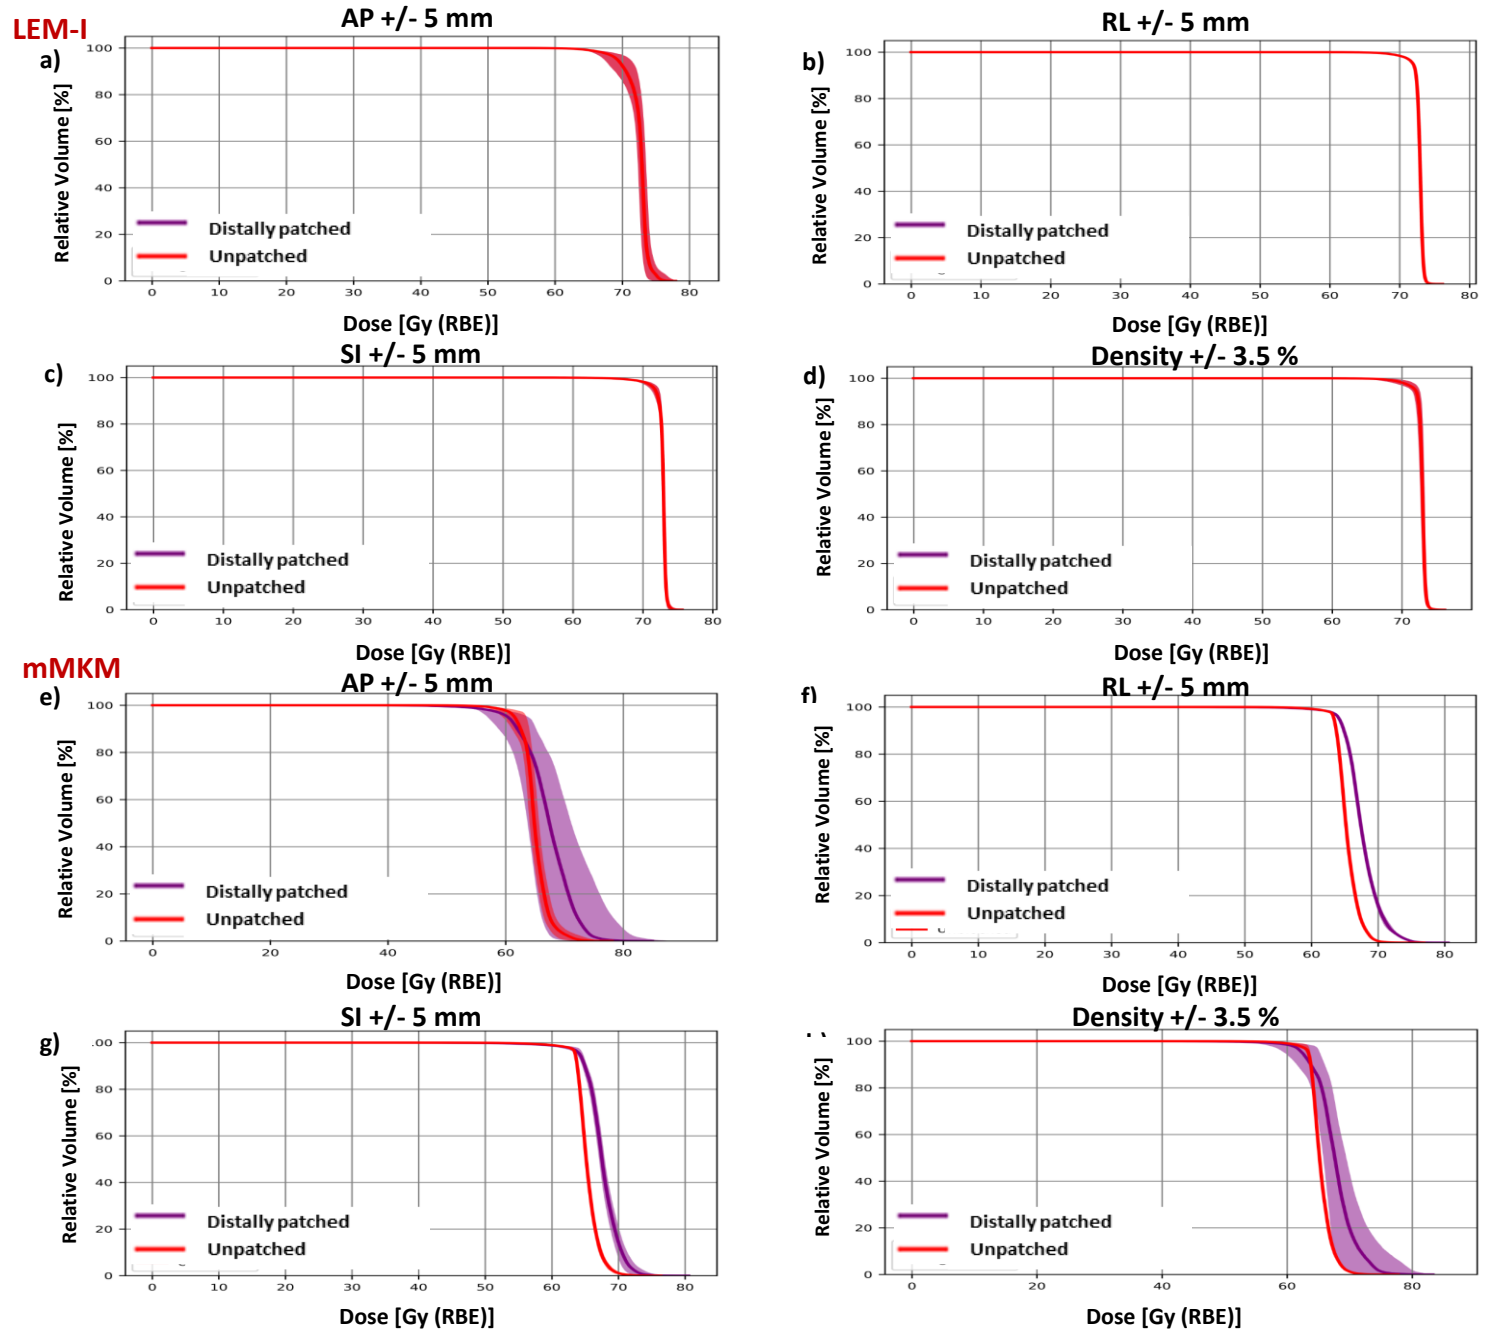

Figure S7. A representative case of large pelvic chordoma demonstrating an evaluation of robustness with respect to range (density  $\pm 3.5\%$ ) and setup uncertainties [ $\pm 5$ mm shifts in antero-posterior (AP), supero-inferior (SI) and right and left (RL)] for  $D_{RBE|LEM-I}$ ,  $D_{RBE|mMKM}$  distribution. (a–d) Distally-patched plan shows compromise in LEM-I target coverage for HD-CTV for antero-posterior shifts. (e–h) Distally-patched plan shows slight compromise in mMKM target coverage for HD-CTV for antero-posterior shifts and range uncertainties.
